# Supplementary material for: Biofilms as agents of Ediacara-style fossilization
Source: PubMed Central journal article supplement (PMC9127100; doi:10.1038/s41598-022-12473-1), 2022-05-23
Supplement: 41598_2022_12473_MOESM1_ESM.pdf [file 41598_2022_12473_MOESM1_ESM.pdf]

Supplementary Information for

## **Biofilms as agents of Ediacara-style fossilization**

Silvina Slagter\*, Weiduo Hao, Noah J. Planavsky, Kurt O. Konhauser and Lidya G. Tarhan

\*Corresponding author. Email: [silvina.slagter@yale.edu](mailto:silvina.slagter@yale.edu)

### **This PDF file includes:**

Fig. S1. Representative photographs of the fossilization experiments.

Fig. S2. SEM-SE images of experiments associated with biofilms.

Fig. S3. Acid-base titration curves.

Fig. S4. Modeled functional groups.

Table S1. Time series of dissolved silica concentrations.

Table S2. Carbon content of experimental substrates through time.

Table S3. Silica sorbed normalized to biomass.

Table S4. Acid-base titration results and surface complexation model.

Table S5. Artificial seawater solution.

Table S6. Dissolved silica concentration in experiments with and without biofilms.

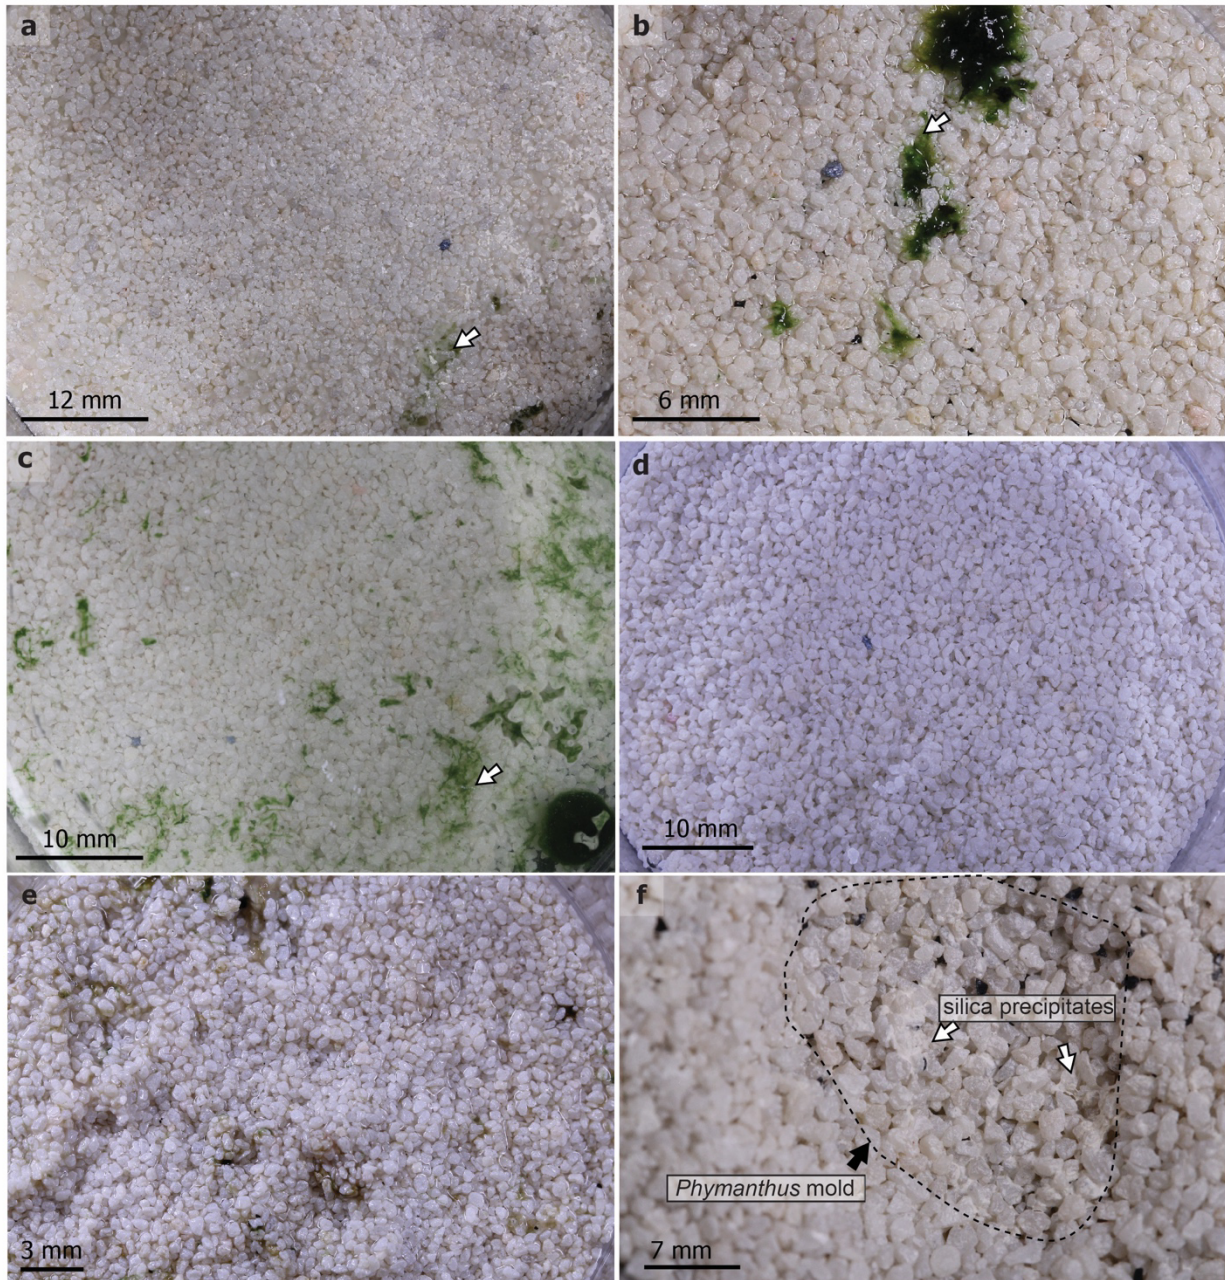

**Fig. S1. Representative experimental photographs.** a-d, Images of experiments after 48 hours and initial 2 mM DSi associated with *Fischerella* (experiment 4; a), *Spirogyra* (experiment 7; b), and *Anabaena* (experiment 5; c). Arrows denote examples of biofilm colonies; d-f, Images of experiments after removing *Phymanthus* (150 h), control experiment without DSi (experiment 2; d), initial 2 mM DSi (experiment 8; e) and initial 2 mM DSi and biofilms (experiment 11; f) where silica precipitates are visible in the ‘proto-fossil’ mold.



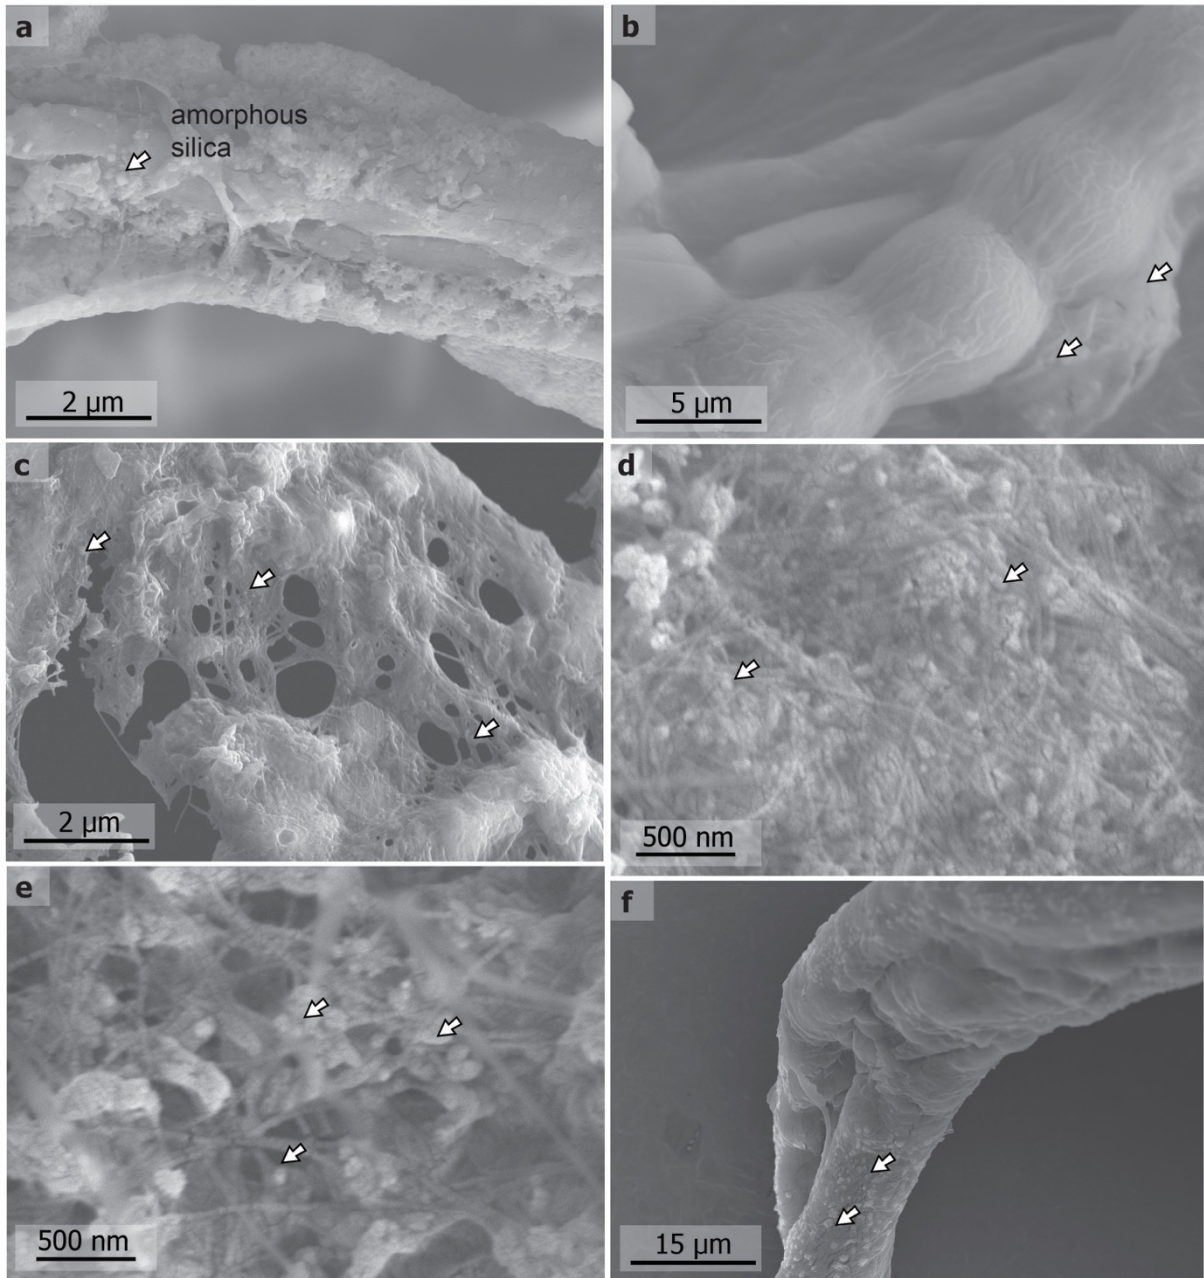

**Fig. S2. SEM-SE images of experiments associated with biofilms.** Images showing silica precipitation (examples indicated with arrows) associated with *Fischerella* (a; 150 h), *Anabaena* (b; 48 h), *Vaucheria* (c and d; 120 h), and *Spirogyra* (e and f; 96 h).

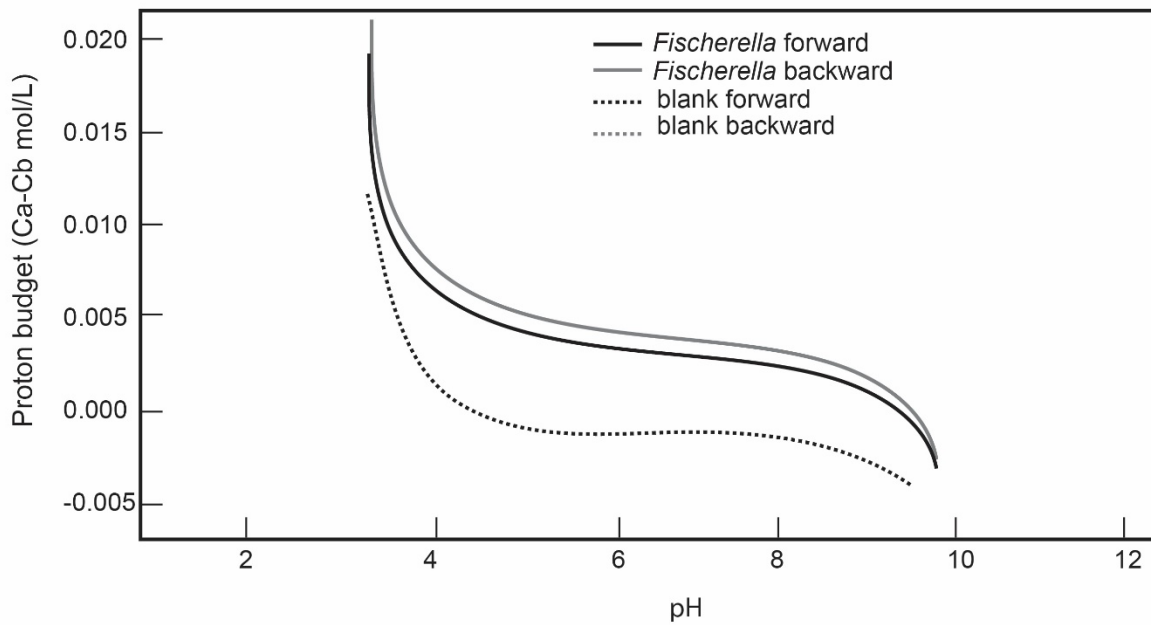

**Fig. S3. Acid-base titration curves.** Example of acid-base titration curves for *Fischerella*.

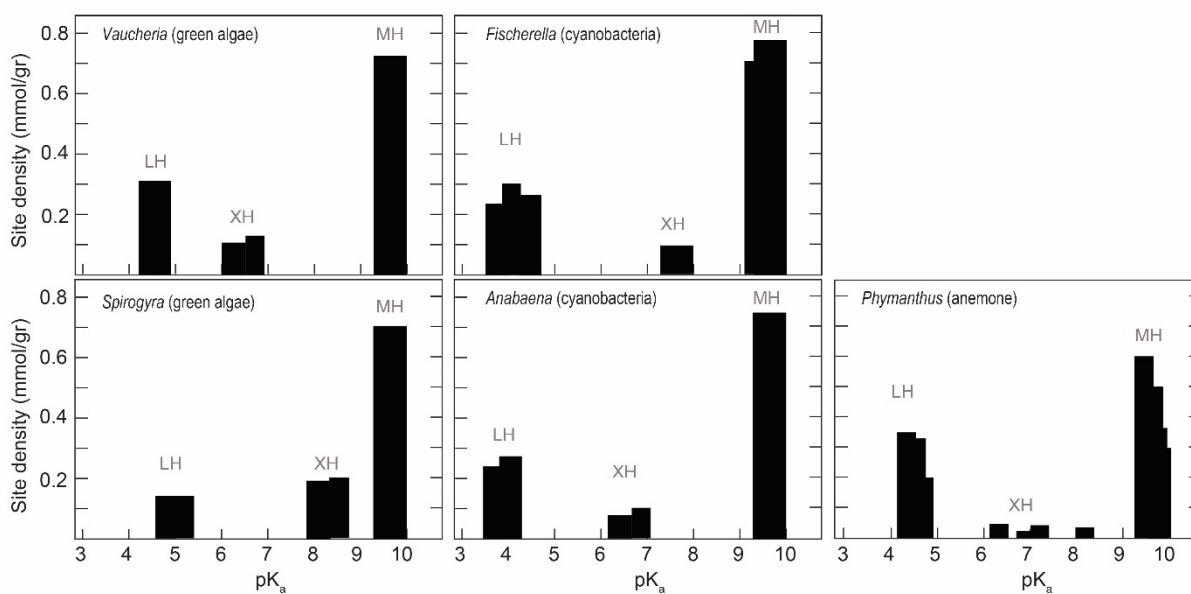

**Fig. S4. Modeled functional groups, identified as ligands  $\equiv\text{LH}$ ,  $\equiv\text{XH}$ , and  $\equiv\text{MH}$ , of each experimental organism, plotted as density of deprotonated sites (excess charge) *Phymanthus* data from ref. 1.**

**Table S1. Time series of dissolved silica concentrations (means of three replicates)**

|    |                       | DSi (mM) |       |       |       |       |       |       |
|----|-----------------------|----------|-------|-------|-------|-------|-------|-------|
|    | Experiment            | 8 h      | 26 h  | 48 h  | 72 h  | 120 h | 138 h | 150 h |
| 3  | DSi, Sa               | 2.000    | 1.999 | 1.999 | 1.959 | 1.987 | 2.016 | 1.999 |
| 4  | DSi, <i>F</i> , Sa    | 1.550    | 0.630 | 0.589 | 0.525 | 0.515 | 0.450 | 0.439 |
| 5  | DSi, <i>A</i> , Sa    | 1.690    | 0.433 | 0.433 | 0.433 | 0.528 | 0.510 | 0.447 |
| 6  | DSi, <i>V</i> , Sa    | 1.849    | 0.442 | 0.531 | 0.348 | 0.584 | 0.784 | 0.436 |
| 7  | DSi, <i>S</i> , Sa    | 1.529    | 1.485 | 1.375 | 1.350 | 1.200 | 0.629 | 0.684 |
| 8  | DSi, <i>P</i>         | 1.014    | 0.880 | 0.665 | 0.699 | 0.631 | 0.753 | 0.677 |
| 9  | DSi, <i>P</i> , Sa    | 1.318    | 0.870 | 0.876 | 0.685 | 0.773 | 0.793 | 0.788 |
| 10 | DSi, Sa, B            | 1.234    | 0.702 | 0.746 | 0.782 | 0.699 | 0.552 | 0.518 |
| 11 | DSi, <i>P</i> , B, Sa | 1.230    | 0.784 | 0.584 | 0.426 | 0.342 | 0.325 | 0.206 |

DSi: dissolved silica; *P*: *Phymanthus*, B: biofilms, Sa: sand, *F*: *Fischerella*

*A*: *Anabaena*, *V*: *Vaucheria*, and *S*: *Spirogyra*. Experiments 1 and 2 are control experiments performed without DSi (see Main Text Table 1).

**Table S2. Final dissolved silica concentration (mM) in experiments conducted both with and without biofilms**

| With biofilms<br>(experiments 10 and 11) | Without biofilms<br>(experiments 8 and 9) |
|------------------------------------------|-------------------------------------------|
| 0.875                                    | 1.014                                     |
| 0.784                                    | 0.880                                     |
| 0.584                                    | 0.665                                     |
| 0.426                                    | 0.589                                     |
| 0.342                                    | 0.631                                     |
| 0.325                                    | 0.753                                     |
| 0.204                                    | 0.677                                     |
| 0.023                                    | 1.014                                     |
| 0.784                                    | 0.980                                     |
| 0.584                                    | 0.665                                     |
| 0.444                                    | 0.589                                     |
| 0.342                                    | 0.631                                     |
| 0.329                                    | 1.753                                     |
| 0.106                                    | 0.477                                     |
| 0.230                                    | 0.114                                     |
| 0.641                                    | 1.180                                     |
| 0.311                                    | 1.565                                     |
| 0.426                                    | 0.789                                     |
| 0.942                                    | 0.611                                     |
| 0.625                                    | 0.753                                     |
| 0.206                                    | 0.671                                     |
| 0.875                                    | 1.014                                     |
| 0.812                                    | 0.967                                     |
| 0.581                                    | 0.665                                     |
| 0.426                                    | 0.699                                     |
| 0.356                                    | 0.231                                     |
| 0.355                                    | 0.743                                     |
| 0.121                                    | 0.617                                     |
| 0.023                                    | 1.001                                     |
| 0.784                                    | 1.000                                     |
| 0.554                                    | 0.632                                     |
| 0.426                                    | 0.765                                     |
| 0.686                                    | 0.636                                     |
| 0.325                                    | 1.753                                     |
| 1.106                                    | 0.456                                     |
| 0.366                                    | 0.114                                     |
| 0.640                                    | 1.180                                     |
| 0.384                                    | 1.678                                     |
| 0.426                                    | 0.656                                     |
| 0.342                                    | 0.351                                     |
| 0.325                                    | 0.749                                     |
| 0.200                                    | 0.687                                     |

**Table S3. Carbon content of experimental substrates through time**

| Experiment | Time (h) | Weight (g) | % C   |
|------------|----------|------------|-------|
| 1          | 24       | 1.73       | 7.23  |
|            | 48       | 1.08       | 2.43  |
|            | 120      | 1.65       | 10.26 |
|            | 144      | 0.45       | 17.54 |
| 2          | 72       | 0.31       | 33.79 |
|            | 96       | 1.33       | 12.31 |
|            | 120      | 0.76       | 9.41  |
|            | 144      | 3.05       | 8.67  |
|            | 150      | 3.8        | 5.4   |
| 4          | 24       | 4.8        | 5     |
|            | 72       | 0.79       | 9.9   |
|            | 96       | 2.9        | 6.5   |
|            | 144      | 3.1        | 1.7   |
|            | 150      | 3.3        | 0.6   |
| 5          | 24       | 2.8        | 5.2   |
|            | 48       | 4.4        | 7.2   |
|            | 120      | 1.2        | 3     |
|            | 150      | 3.4        | 0.6   |
| 6          | 96       | 2.8        | 5     |
|            | 150      | 5.5        | 2     |
| 7          | 48       | 2.19       | 12.1  |
|            | 150      | 0.9        | 9     |
| 8          | 48       | 2.28       | 12.14 |
| 9          | 24       | 1.5        | 9.84  |
|            | 150      | 2.7        | 1.8   |
| 10         | 48       | 1.2        | 7.23  |
|            | 150      | 5          | 1.3   |
| 11         | 24       | 2.03       | 28.69 |
|            | 72       | 2.29       | 12.75 |
|            | 150      | 1          | 3.63  |



**Table S4. Silica sorbed normalized to biomass**

| Experiment | Final DSi (mM) | Initial biomass (g) | Silica sorbed (mM) | Silica sorbed per gram of biomass |
|------------|----------------|---------------------|--------------------|-----------------------------------|
| 4          | 0.439          | 10                  | 1.561              | 0.156                             |
| 5          | 0.447          | 10                  | 1.553              | 0.155                             |
| 6          | 0.436          | 10                  | 1.564              | 0.156                             |
| 7          | 0.684          | 10                  | 1.316              | 0.132                             |
| 8          | 0.677          | 15.23               | 1.323              | 0.087                             |
| 9          | 0.788          | 12.33               | 1.212              | 0.098                             |
| 10         | 0.518          | 10                  | 1.482              | 0.148                             |
| 11         | 0.206          | 14.22               | 1.794              | 0.126                             |

**Table S5. Acid-base titration and surface complexation model results**

| Sample                   | Log(Ka)*                         |                                  |                              | Site density (mol/L)** |           |           |
|--------------------------|----------------------------------|----------------------------------|------------------------------|------------------------|-----------|-----------|
|                          | <i>Ka1</i>                       | <i>Ka2</i>                       | <i>Ka3</i>                   | <i>LH</i>              | <i>XH</i> | <i>MH</i> |
| <i>Vaucheria</i>         | 4.04<br>(carboxyl)               | 8.38<br>(carboxyl or phosphoryl) | 10.83<br>(hydroxyl or amino) | 3.04E-04               | 1.30E-04  | 8.02E-04  |
| <i>Fischerella</i>       | 4.62<br>(carboxyl)               | 8.24<br>(carboxyl or phosphoryl) | 10.8<br>(hydroxyl or amino)  | 2.52E-04               | 2.97E-04  | 9.80E-04  |
| <i>Anabaena</i>          | 4.2<br>(carboxyl or phosphoryl)  | 7.75<br>(carboxyl or phosphoryl) | 10.61<br>(hydroxyl or amino) | 2.61E-04               | 1.22E-04  | 9.49E-04  |
| <i>Spirogyra</i>         | 4.09<br>(carboxyl)               | 7.97<br>(carboxyl or phosphoryl) | 10.36<br>(hydroxyl or amino) | 2.22E-04               | 1.66E-04  | 7.03E-04  |
| <i>Phymanthus</i><br>*** | 5.31<br>(carboxyl or phosphoryl) | 7.64<br>carboxyl or phosphoryl)  | 9.24<br>(hydroxyl or amino)  | 1.25E-04               | 4.86E-05  | 1.48E-04  |

\*Identification of functional groups is based on comparison with literature<sup>2</sup>.

\*\*Site density and pKa (i.e., Log(Ka)) values represent the mean values of all replicates.

\*\*\**Phymanthus* data from ref. 1

**Table S6. Artificial seawater solution**

| Component                                           | Concentration (g/kg) |
|-----------------------------------------------------|----------------------|
| NaCl                                                | 23.7034              |
| NaSO <sub>4</sub>                                   | 4.008                |
| KCl                                                 | 0.865                |
| NaHCO <sub>3</sub>                                  | 0.296                |
| Na <sub>2</sub> SiO <sub>3</sub> ·9H <sub>2</sub> O | 0.568                |
| H <sub>2</sub> O                                    | 970.48               |

### Supplementary references

1. Slagter, S., Tarhan, L. G., Hao, W., Planavsky, N. J. & Konhauser, K. O. Experimental evidence supports early silica cementation of the Ediacara Biota. *Geology* **49**, 51–55 (2021).
2. Fein, J. B., Boily J.-F., Yee N., Gorman-Lewis, D. & Turner, B. F. Potentiometric titrations of *Bacillus subtilis* cells to low pH and a comparison of modeling approaches. *Geochim. Cosmochim. Acta* **69**, 1123-1132 (2005).
